# Supplementary material for: A Multi-Level Approach as a Powerful Tool to Identify and Characterize Some Italian Autochthonous Common Bean (Phaseolus vulgaris L.) Landraces under a Changing Environment
Source: MDPI journal article supplement (doi:10.3390/plants11202790), 2022-10-21
Supplement: s1 [file s1]

## Supplementary Materials

**Table S1. Morphological descriptors and analysis.** Quantitative and qualitative seed morphological parameters measured for each common bean population. Data represent the mean ( $n = 10$ )  $\pm$  standard error. CV: Ciliegino; SMR: San Michele Rosso; MO: Monachella; MA: Mascherino; PI: Pinto; TR: Tuvagliedda Rossa; SA: Suocera e Nuora.

| Population name | Source                                                                        | 100 seed weight (g) | 100 seed volume (mL) | 100 seed density (g·mL <sup>-1</sup> ) | Total area (mm <sup>2</sup> ) | Perimeter (mm)   | Roundness       | Major axis lenght (mm) | Minor axis lenght (mm) | Dark coloured seed area (mm <sup>2</sup> ) | Light coloured seed area (mm <sup>2</sup> ) | Number of seed coat colours | Main seed coat colour | Predominant secondary seed coat colour | Seed shape | Seed coat pattern |
|-----------------|-------------------------------------------------------------------------------|---------------------|----------------------|----------------------------------------|-------------------------------|------------------|-----------------|------------------------|------------------------|--------------------------------------------|---------------------------------------------|-----------------------------|-----------------------|----------------------------------------|------------|-------------------|
| CV              | Vastogirardi (Molise)<br>41° 46' 9.651" (N)<br>14° 15' 28.894" (E)            | 32.17 $\pm$ 1.75    | 51.33 $\pm$ 5.93     | 0.64 $\pm$ 0.05                        | 60.40 $\pm$ 3.84              | 30.32 $\pm$ 0.90 | 6.32 $\pm$ 0.27 | 10.37 $\pm$ 0.30       | 7.02 $\pm$ 0.29        | 60.40 $\pm$ 3.84                           | 0 $\pm$ 0                                   | one                         | red                   | none                                   | oval       | absent            |
| SMR             | Sarconi (Basilicata)<br>40° 14' 38.04" (N)<br>15° 51' 55.439" (E)             | 39.90 $\pm$ 2.02    | 72.00 $\pm$ 3.46     | 0.55 $\pm$ 0.00                        | 55.15 $\pm$ 2.64              | 28.15 $\pm$ 0.62 | 7.68 $\pm$ 0.21 | 9.64 $\pm$ 0.30        | 7.40 $\pm$ 0.28        | 55.15 $\pm$ 2.64                           | 0 $\pm$ 0                                   | one                         | red                   | none                                   | oval       | absent            |
| MO              | Vastogirardi (Molise)<br>41° 46' 50.074" (N)<br>14° 17' 44.116" (E)           | 51.57 $\pm$ 3.09    | 80.00 $\pm$ 3.06     | 0.64 $\pm$ 0.02                        | 67.75 $\pm$ 1.67              | 31.47 $\pm$ 0.39 | 7.96 $\pm$ 0.31 | 10.42 $\pm$ 0.35       | 8.44 $\pm$ 0.22        | 48.88 $\pm$ 2.38                           | 43.15 $\pm$ 3.43                            | two                         | dark                  | white                                  | round      | bicolor           |
| MA              | Piazza al Serchio (Tuscany)<br>44° 10' 26.828" (N)<br>10° 18' 42.901" (E)     | 60.20 $\pm$ 1.99    | 92.67 $\pm$ 1.76     | 0.65 $\pm$ 0.01                        | 94.48 $\pm$ 3.37              | 37.19 $\pm$ 0.67 | 7.29 $\pm$ 0.25 | 12.47 $\pm$ 0.24       | 9.39 $\pm$ 0.22        | 48.11 $\pm$ 4.78                           | 46.82 $\pm$ 3.04                            | two                         | dark                  | white                                  | oval       | bicolor           |
| PI              | Agnone (Molise)<br>41° 51' 1.076" (N)<br>14° 20' 45.679" (E)                  | 57.90 $\pm$ 2.68    | 92.67 $\pm$ 3.53     | 0.62 $\pm$ 0.01                        | 82.36 $\pm$ 3.88              | 34.63 $\pm$ 0.82 | 7.21 $\pm$ 0.23 | 12.38 $\pm$ 0.40       | 9.14 $\pm$ 0.31        | 21.02 $\pm$ 3.41                           | 60.91 $\pm$ 5.68                            | two                         | white                 | dark                                   | oval       | bicolor           |
| TR              | Sarconi (Basilicata)<br>40° 14' 38.04" (N)<br>15° 51' 55.439" (E)             | 57.67 $\pm$ 0.22    | 86.67 $\pm$ 0.67     | 0.67 $\pm$ 0.01                        | 81.94 $\pm$ 2.74              | 33.94 $\pm$ 0.55 | 7.92 $\pm$ 0.19 | 11.72 $\pm$ 0.35       | 9.56 $\pm$ 0.18        | 42.46 $\pm$ 3.42                           | 40.79 $\pm$ 3.02                            | more than two               | dark                  | white                                  | oval       | spotted bicolor   |
| SA              | Sant' Angelo del Pesco (Molise)<br>41° 54' 18.619" (N)<br>14° 16' 49.367" (E) | 39.97 $\pm$ 1.36    | 77.33 $\pm$ 2.40     | 0.52 $\pm$ 0.01                        | 81.06 $\pm$ 4.93              | 33.91 $\pm$ 0.93 | 7.63 $\pm$ 0.23 | 11.95 $\pm$ 0.41       | 8.98 $\pm$ 0.26        | 42.71 $\pm$ 4.13                           | 32.24 $\pm$ 2.45                            | two                         | dark                  | white                                  | oval       | bicolor           |



**Table S3. Primers used for ISSR analysis and their respective markers performance indexes.** The ISSR primer name, 5’-3’ sequence (reported in Marotti et al. [2] and Pena-Ortega et al. [28]), and annealing temperature are listed together with their performance indexes: Number of Total Bands (NTB), Number of Monomorphic Bands (NMB), Number of Polymorphic Bands (NPB), Percentage of Polymorphic Bands (%P), Resolving Power (RP) and Polymorphism Information Content (PIC).

| Primer name | Nucleotide sequence<br>5' -> 3' | Annealing<br>temperature | NTB | NMB | NPB | %P     | RP   | PIC  |
|-------------|---------------------------------|--------------------------|-----|-----|-----|--------|------|------|
| LOL2        | (CT) <sub>8</sub> GC            | 37 °C                    | 8   | 4   | 4   | 50.00  | 2.57 | 0.22 |
| LOL7        | (GAGA) <sub>3</sub> CC          | 34 °C                    | 7   | 3   | 4   | 57.14  | 2.29 | 0.24 |
| LOL8        | (GT) <sub>6</sub> CC            | 34 °C                    | 7   | 6   | 1   | 14.29  | 0.29 | 0.03 |
| LOL9        | (CAC) <sub>3</sub> GC           | 34 °C                    | 8   | 3   | 5   | 62.50  | 3.09 | 0.26 |
| LOL10       | (GAG) <sub>3</sub> GC           | 34 °C                    | 6   | 1   | 5   | 83.33  | 2.63 | 0.32 |
| LOL12       | (GTG) <sub>3</sub> GC           | 34 °C                    | 8   | 0   | 8   | 100.00 | 5.60 | 0.44 |
| PHV06       | CCA(CT) <sub>8</sub>            | 37 °C                    | 4   | 4   | 0   | 0.00   | 0.34 | 0.08 |
| PHV07       | GTG(GT) <sub>8</sub>            | 38 °C                    | 4   | 2   | 2   | 50.00  | 1.03 | 0.20 |

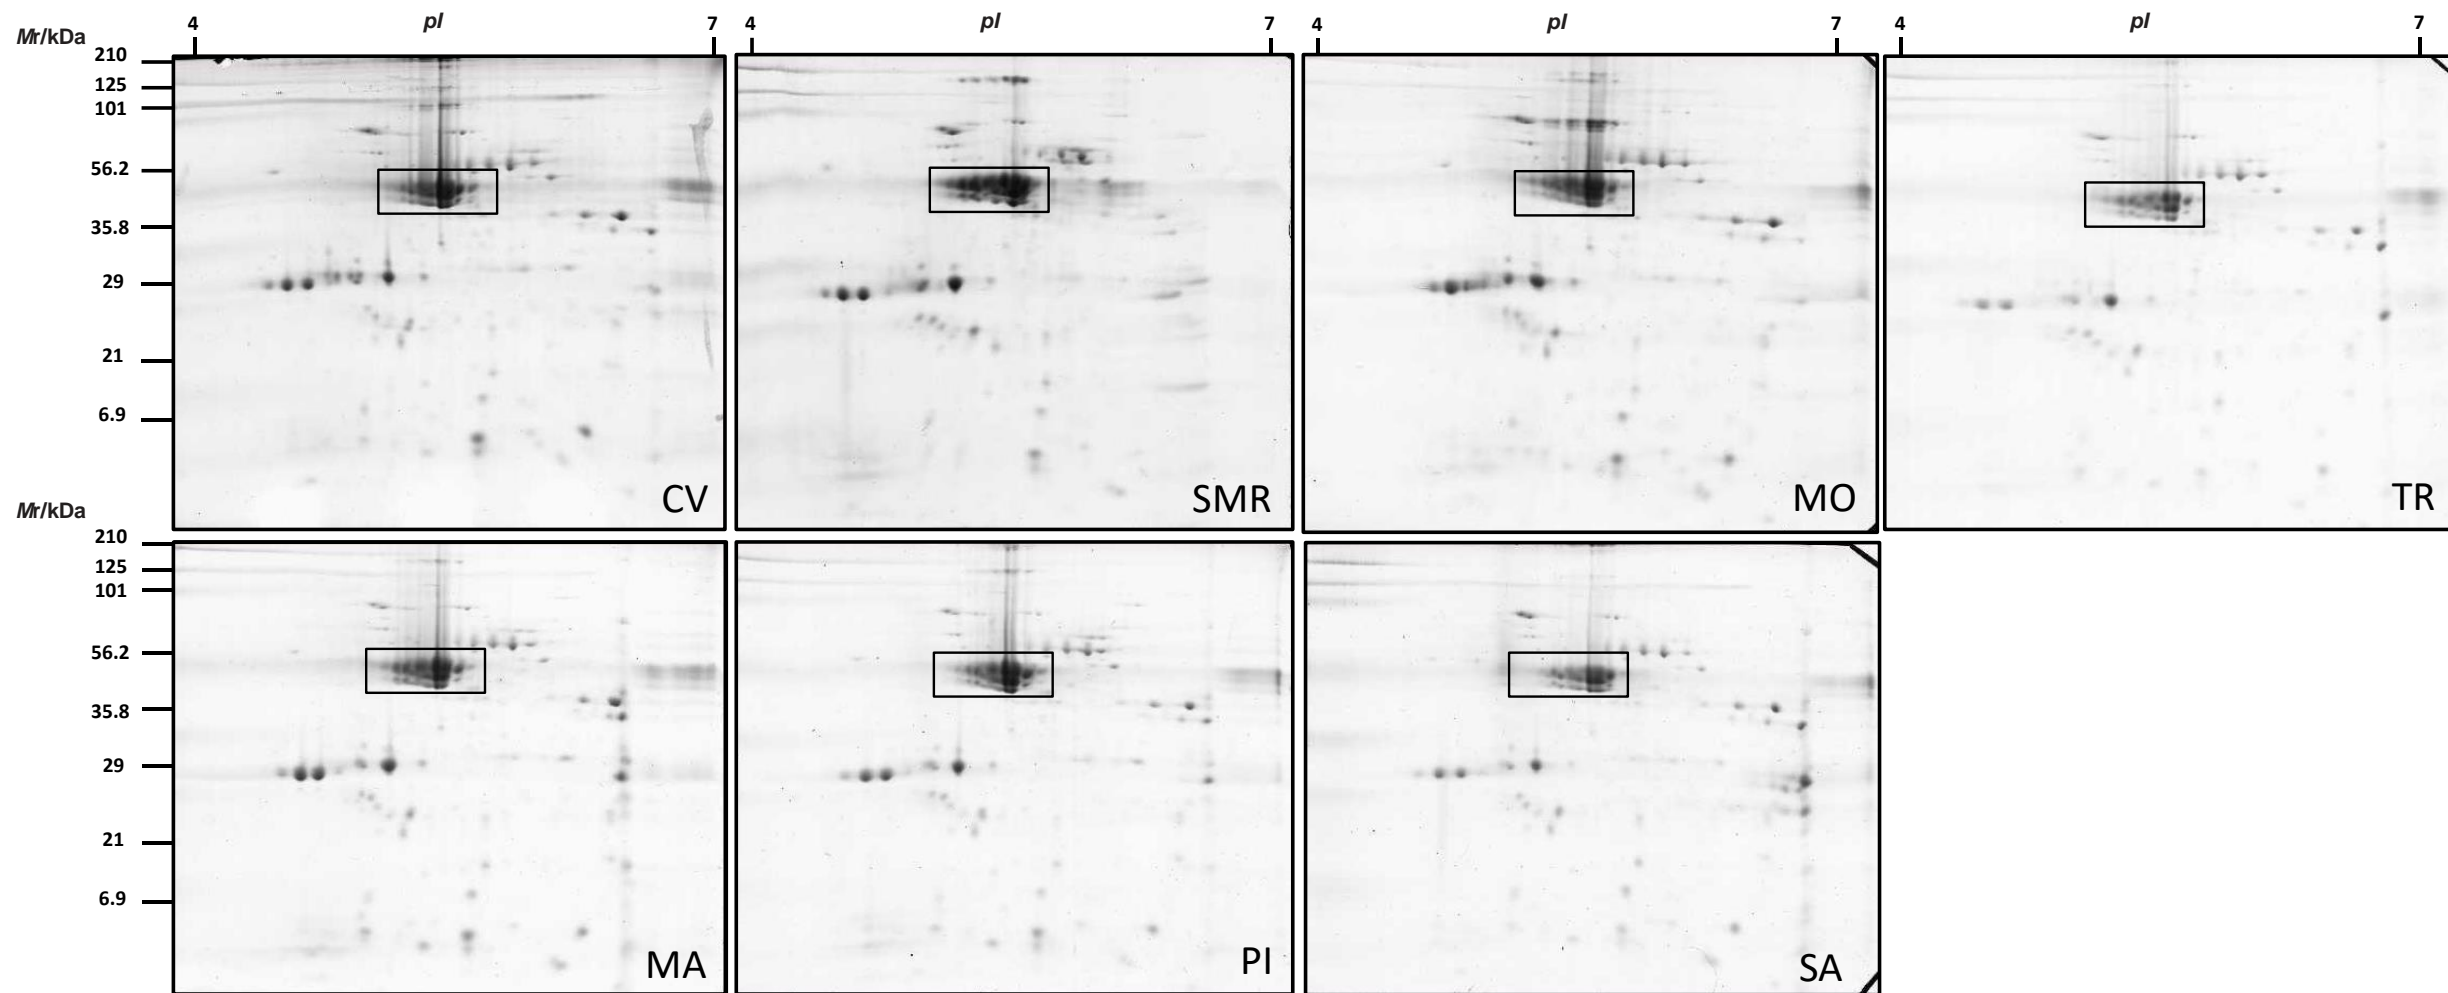

**Figure S1. 2-DE profiles of common bean landraces.** 2-DE was performed using 50 µg of total protein loaded on 7-cm long IPG strips, pH=4–7, and 15% (by mass) polyacrylamide gels. Gel regions containing phaseolin spots are enclosed in rectangles. CV: Ciliegino; SMR: San Michele Rosso; MO: Monachella; MA: Mascherino; PI: Pinto; TR: Tuvagliedda Rossa; SA: Suocera e Nuora.

## Molise Region

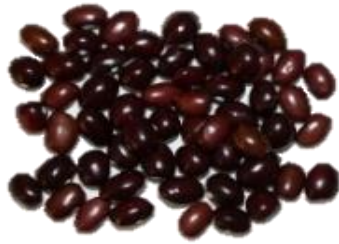

Ciliegino - CV  
Vastogirardi (IS)

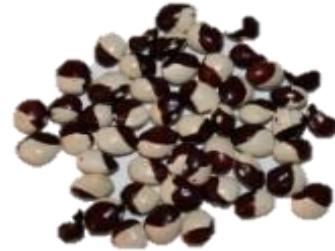

Monachella - MO  
Vastogirardi (IS)

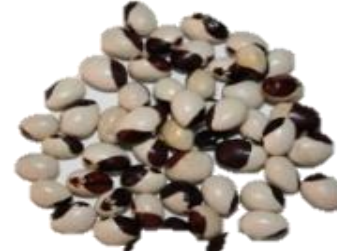

Pinto - PI  
Agnone (IS)

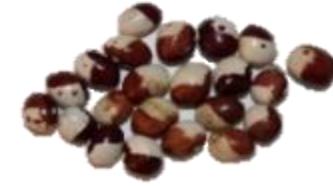

Suocera e Nuora - SA  
Sant'Angelo del Pesco (IS)

## Basilicata Region

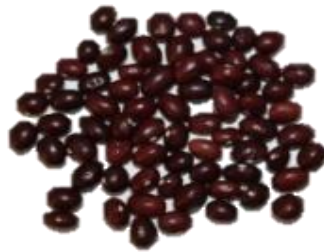

San Michele Rosso - SMR  
Sarconi (PZ)

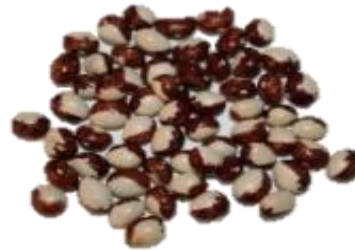

Tuvagliedda Rossa - TR  
Sarconi (PZ)

## Tuscany Region

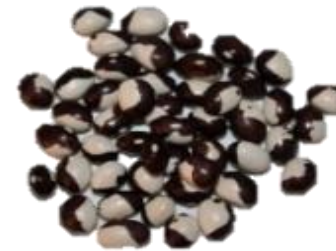

Mascherino - MA  
Piazza al Serchio (LU)

**Figure S2. Autochthonous Italian Common bean seed accessions.** Seed of the seven *Phaseolus vulgaris* L. landraces analyzed in the present study and cultivated in the Molise region (Italy) and in other two Italian Apennine regions (Tuscany and Basilicata – Italy).
